# 1 An RNA foundation model enables discovery of 2 disease mechanisms and candidate therapeutics

3  
4 Albi Celaj, Alice Jiexin Gao, Tammy T.Y. Lau, Erle M. Holgersen, Alston Lo, Varun Lodaya,  
5 Christopher B. Cole, Robert E. Denroche, Carl Spickett, Omar Wagih, Pedro O. Pinheiro,  
6 Parth Vora, Pedrum Mohammadi-Shemirani, Steve Chan, Zach Nussbaum, Xi Zhang,  
7 Helen Zhu, Easwaran Ramamurthy, Bhargav Kanuparthi, Michael Iacocca, Diane Ly, Ken  
8 Kron, Marta Verby, Kahlin Cheung-Ong, Zvi Shalev, Brandon Vaz, Sakshi Bhargava,  
9 Farhan Yusuf, Sharon Samuel, Sabriyeh Alibai, Zahra Baghestani, Xinwen He, Kirsten  
10 Krastel, Oladipo Oladapo, Amrudha Mohan, Arathi Shanavas, Magdalena Bugno,  
11 Jovanka Bogojeski, Frank Schmitges, Carolyn Kim, Solomon Grant, Rachana Jayaraman,  
12 Tehmina Masud\*, Amit Deshwar\*, Shreshth Gandhi\*, Brendan J. Frey\*

13

## 14 Abstract

15 Accurately modeling and predicting RNA biology has been a long-standing challenge,  
16 bearing significant clinical ramifications for variant interpretation and the formulation of  
17 tailored therapeutics. We describe a foundation model for RNA biology, “BigRNA”, which  
18 was trained on thousands of genome-matched datasets to predict tissue-specific RNA  
19 expression, splicing, microRNA sites, and RNA binding protein specificity from DNA  
20 sequence. Unlike approaches that are restricted to missense variants, BigRNA can  
21 identify pathogenic non-coding variant effects across diverse mechanisms, including  
22 polyadenylation, exon skipping and intron retention. BigRNA accurately predicted the  
23 effects of steric blocking oligonucleotides (SBOs) on increasing the expression of 4 out  
24 of 4 genes, and on splicing for 18 out of 18 exons across 14 genes, including those  
25 involved in Wilson disease and spinal muscular atrophy. We anticipate that BigRNA and  
26 foundation models like it will have widespread applications in the field of personalized  
27 RNA therapeutics.

## 28 Main

29 Building machine learning models that can predict gene expression from DNA sequence  
30 has been a long-standing research goal<sup>1</sup>, and one that has seen significant strides  
31 owing to recent advancements in deep learning<sup>2</sup>. These models could revolutionize  
32 drug discovery by pinpointing how pathogenic genetic variants alter gene expression  
33 and gene processing, and by designing customized drug candidates to counteract these  
34 effects<sup>3</sup>. Currently, most efforts have focused on predicting data that measures overall

35 gene expression levels<sup>2,4</sup>, which are not suited to predicting regulatory interventions, for  
36 example, specific transcriptional perturbations on splicing or polyadenylation.

37

38 RNA sequencing (RNA-seq) data provides a widely-available resource for measuring  
39 RNA expression at high resolution and capturing complex transcriptional regulation  
40 events across diverse genotypes. This includes both exome variation inherently coded  
41 within RNA-seq data itself, and through extensive resources like the Genotype-Tissue  
42 Expression<sup>5</sup> (GTEx) project that pairs RNA-seq with Whole Genome Sequencing (WGS).  
43 While building deep neural networks that directly learn from RNA-seq offers the  
44 opportunity to understand how changes in DNA sequence lead to changes in complex  
45 transcriptional phenotypes, this goal has remained elusive.

46

47 We introduce “BigRNA”, a deep learning model that is directly trained on RNA-seq  
48 datasets. BigRNA learns from paired genotype and 128bp resolution RNA expression  
49 data from many individuals, and can also be applied in a range of downstream tasks  
50 such as predicting RNA-binding protein (RBP) specificity and microRNA binding sites.  
51 Because BigRNA directly models RNA-seq data, it can discover a diverse set of  
52 pathogenic non-coding mechanisms that would each require a specialized model, and  
53 can pinpoint their effects on a transcript. We show that BigRNA can discover the  
54 effects of non-coding variants on expression and splicing, and matches or exceeds the  
55 performance of specialized models in recovering known pathogenic variants.

56

57 BigRNA can also help design different types of RNA based therapeutics, including steric  
58 blocking oligonucleotides (SBOs). Without any additional training, BigRNA accurately  
59 identifies compounds that induce a targeted splicing change, and recovers known  
60 approved SBO therapies with high specificity. The ability of BigRNA to understand  
61 regulatory mechanisms also allows it to design SBOs that block predicted inhibitory  
62 regions to increase the expression of a disease gene. BigRNA represents a new  
63 generation of massive deep learning models that can be applied to a range of different  
64 personalized RNA therapeutic discovery tasks.

## 65 Results

### 66 **BigRNA accurately predicts tissue-specific RNA expression and the binding sites of** 67 **proteins and microRNAs**

68

69 To train BigRNA to predict RNA-seq data from the corresponding DNA sequence, we  
70 employed a transformer-based architecture<sup>2</sup> and utilized the GTEx<sup>5</sup> resource (**Methods**).  
71 Given an individual's genotype, we input two potential haplotypes independently into

72 identical instances of the model, and train it to predict the observed RNA-seq data as  
73 the combined output from these haplotypes ([Fig. 1a](#), [Supplementary Figs. S1 and S2](#)).  
74 Each output "head" of the model predicts the expression of a single GTEx sample, so  
75 that it learns to predict the outputs of 2,956 RNA-seq samples from 70 individuals,  
76 covering 51 tissues in total. After training on these RNA-seq datasets, the model is  
77 fine-tuned to predict the specificity of RBP and microRNA binding sites ([Fig. 1a](#)).

78

79 We first evaluated the ability of BigRNA to predict the expression of unseen genomic  
80 sequences. We measured the model's ability to predict tissue-specific expression levels  
81 for all genes outside of genomic regions in the training set. BigRNA exhibited strong  
82 performance for predicting expression levels of unseen genes, achieving a correlation  
83 coefficient ( $r$ ) between 0.47 and 0.77 across all tissues (mean=0.70, [Fig. 1b](#)). We  
84 observed slightly stronger performance in brain tissues than non-brain tissues (mean  
85  $r=0.74$  versus 0.69,  $p=5e-03$ ), and highlight that the model is able to accurately predict  
86 expression levels in the hypothalamus ( $r=0.74$ , [Fig. 1c](#)). The ability to predict overall  
87 expression levels and capability to accurately delineate intron/exon junctions is  
88 illustrated by BigRNA's predictions for *SLC7A8*, an amino acid transporter within the test  
89 set ([Fig. 1d](#)). To evaluate BigRNA on the much harder task of predicting differences  
90 between pairs of tissues, we used BigRNA predictions to compute the fold-change in  
91 total exonic coverage between tissue pairs and compared that to observed  
92 fold-changes. Across all inter-tissue comparisons, we observed a mean correlation of  
93  $r=0.4$ , owing to the increased difficulty of this task ([Fig. 1e](#)). We highlight a comparison  
94 between liver and the hypothalamus ( $r=0.58$ ,  $p=7e-64$ , [Fig. 1f](#)) to illustrate this capability.

95

96 Since drug discovery tasks benefit from clarity of mechanisms, we next examined how  
97 well the fine-tuned BigRNA model could predict RBP binding specificity and microRNA  
98 binding sites. For the RBP task, we used a large-scale resource of transcriptome-wide  
99 binding profiles for 223 datasets covering 150 unique human RBPs in K562 and HepG2  
100 cells<sup>6</sup>. We found that BigRNA achieved high average precision for many RBPs and  
101 performed better than the previously-published DeepRiPe<sup>7</sup> system for all 142 datasets  
102 that they had in common ([Fig. 1g](#)). On predicting microRNA binding sites, BigRNA  
103 achieved a median AUC of 0.84 and for all 12 cell lines that we tested, performed better  
104 than a previously published method, TargetScan<sup>8</sup> ([Fig. 1h](#)). These predictions are useful  
105 for identifying regulatory factors that are altered by variants and SBOs (see below).

106

### 107 **Predicting the effects of variants on gene expression**

108

109 A key challenge in human genetics is to predict the impact of sequence variants that  
110 may be found within the human population. Many deep learning models that do well on

111 unseen genes using certain metrics, such as AlphaFold<sup>9</sup>, struggle to predict variant  
112 effects<sup>10</sup>. While some accurate methods exist for predicting the pathogenic impact of  
113 rare missense variants<sup>11,12</sup>, non-coding variants, such as those located within the 3' and  
114 5' untranslated regions (UTRs) of genes, remain difficult to interpret.

115

116 To address this gap, we evaluate BigRNA's ability to predict the impact of a curated set  
117 of pathogenic or likely pathogenic (P/LP) UTR variants from ClinVar<sup>13</sup>. We found that  
118 BigRNA exhibited strong performance as a general pathogenicity model for variants in  
119 both the 3' UTR and 5' UTR (AUC=0.95 and 0.8, [Fig. 2a](#)) by predicting their effects on  
120 the expression of their associated disease genes. The weaker performance in the 5'  
121 UTR may be due to a smaller proportion of P/LP variants that modulate RNA expression  
122 (18/47 compared to 16/17 for the 3' UTR amongst variants with known mechanisms,  
123  $p=0.046$ ), and a substantial proportion of mechanisms that affect translation (29/47).  
124 We further investigated a known pathogenic expression-decreasing variant in the 3' UTR  
125 of *NAA10*<sup>14</sup> (NM\_003491.4:c.\*43A>G). This variant is known to cause syndromic  
126 X-linked microphthalmia, and reduces expression by disrupting the polyadenylation site  
127 (PAS) of the *NAA10* transcript. The BigRNA predictions highlight the  
128 expression-decreasing effects of this variant (false positive rate, FPR <0.5%), and also  
129 predicted the expected lengthening of the 3' UTR that was observed in RNA-seq  
130 samples of affected patients<sup>14</sup> ([Fig. 2b](#)). An *in-silico* saturation mutagenesis near this  
131 variant highlighted the importance of the PAS, and confirmed the effects of two other  
132 nearby P/LP variants (c.\*39A>G, c.\*40A>G)<sup>14</sup> ([Fig. 2c](#)).

133

134 We compared BigRNA to Framepool<sup>15</sup>, a ribosomal load model, Saluki<sup>16</sup>, an RNA stability  
135 model, and Enformer<sup>2</sup>, an expression model that learns from CAGE-seq. We observed  
136 improved performance compared to Enformer for pathogenic variants in both the 5' and  
137 3' UTR ( $p=0.04$  and  $p=0.02$ , respectively, **Supplementary Fig. S3**). Framepool, a model  
138 that predicts ribosomal load<sup>15</sup>, performed similarly to BigRNA for pathogenic variant  
139 classification in the 5' UTR (AUC=0.67 versus 0.78 for BigRNA,  $p=0.07$ , **Supplementary**  
140 **Fig. S3**), but BigRNA performed better at classifying the subset of pathogenic 5' UTR  
141 variants that are known to modulate RNA expression (AUC=0.61 versus 0.86 for  
142 BigRNA,  $p=0.002$ , **Supplementary Fig. S4**). Saluki, an RNA half-life model, had similar  
143 performance on the 3' UTR task (AUC=0.87 vs 0.94 for BigRNA,  $p=0.27$ ).

144

145 Within these genes, we noted many variants of uncertain significance (VUS) in their  
146 untranslated regions. Applying BigRNA to these variants at a 5% FPR yielded 12  
147 potential expression-modulating variants in the 3' UTR (out a total of 139) and 23 in the  
148 5' UTR (out a total of 222) ([Fig. 2d](#)). For example, the 3' UTR of *HBB* had the highest  
149 number of VUSs surpassing this threshold ( $n=6$ ). The highest scoring VUS

150 (NM\_000518.5(HBB):c.\*112A>T) is in the PAS of this gene, and shares the same  
151 position as a known pathogenic variant (c.\*112A>G). The PAS region of *HBB* also  
152 contains the majority of known P/LP variants (6 of 8). The second-highest scoring VUS  
153 (c.\*47C>G) was outside of the PAS, and less is known about its function. Looking  
154 further, we found that despite being classified as a VUS, this variant is reported to cause  
155 decreased expression of *HBB*, supporting the BigRNA prediction<sup>17</sup>. We also noted that  
156 three additional P/LP variants in the *HBB* PAS, which were not included in our  
157 benchmark due to a lack of evidence in the ClinVar submission<sup>13</sup>, scored above this  
158 threshold ([Fig. 2e](#)), providing computational support for their P/LP classification.

159  
160 In more genetically complex diseases, it can be challenging to discover causal  
161 expression-modulating variant(s) due to linkage disequilibrium (LD). For example,  
162 rs705379 and rs854572 are both annotated as expression quantitative trait loci (eQTLs)  
163 for Paraoxonase 1 (*PON1*) in GTEx, but a luciferase reporter assay and statistical  
164 fine-mapping of the locus show that only rs705379 has an effect on expression<sup>18,19</sup>,  
165 which is consistent with BigRNA's prediction of a much stronger effect and its direction,  
166 despite the strong LD. BigRNA also assigned a stronger effect, and correct direction, for  
167 two other known expression modulation variants, rs854571 and rs3735590<sup>20</sup> ([Fig. 2f](#)).  
168 To benchmark BigRNA more broadly, we evaluated its ability to identify fine-mapped  
169 eQTLs from negative controls matched on effector gene (eGene), distance to  
170 transcription start site (TSS), and minor allele frequency. We saw considerable  
171 performance for this task (AUC = 0.74, [Fig. 2g](#)), improving over Enformer (AUC = 0.70,  
172  $p=4.8e-04$  for difference, **Supplementary Fig. S5**). We note that a series of  
173 improvements in eQTL scoring, including matching the predictions to the eQTL tissue of  
174 interest, and evaluating over the entire contiguous coding sequence rather than the  
175 transcription start site made significant improvements to our performance for both  
176 models (**Supplemental Note 1**). BigRNA's classification performance was similarly  
177 strong for variants more than 10 kilobases from their eGene's TSS (AUC 0.73, versus  
178 0.66 for Enformer,  $p=8.0e-05$  for difference, **Supplementary Fig. S6**). Together, these  
179 results indicate that BigRNA is able to help prioritize causal variants that mediate more  
180 common diseases, which has been challenging for sequence-based deep neural  
181 networks<sup>18,19</sup>.

182

### 183 **Predicting the effects of variants on splicing and intron retention**

184

185 An important subset of pathogenic variants affect splicing, such as those which cause  
186 skipping of an exon. These variants often occur in coding regions, and may be  
187 incorrectly classified as benign mutations based on their amino acid substitutions,  
188 despite their pathogenic splicing effects<sup>21</sup>. We evaluated BigRNA's ability to classify the

189 splicing impact of exonic variants that cause substantial (>50%) exon skipping, versus  
190 those that do not cause any splicing changes, using results from a massively parallel  
191 splicing assay (MaPSy)<sup>21</sup>. By predicting a change in junction coverage caused by these  
192 variants, BigRNA was able to accurately predict these skipping variants (AUC = 0.89 [Fig.](#)  
193 [3a](#)), and showed better performance compared to a previously published method,  
194 SpliceAI<sup>22</sup> on this task (AUC=0.80,  $p < 1e-05$  for difference, **Supplementary Fig. S7**). We  
195 further investigated a pathogenic variant that causes skipping of exon 6 in the *ACADM*  
196 gene, leading to a potentially fatal medium-chain acyl-CoA dehydrogenase  
197 deficiency<sup>23,24</sup>. BigRNA predicted the exon skipping effects of this variant (FPR = 0.002,  
198 [Fig. 3b](#)), and that it causes this skipping by creating a binding site for the TDP-43  
199 protein<sup>23</sup>, yielding insight into the mechanism-of-action. We further investigated a VUS  
200 in *ATP7B* (c.3243+5G>A), a gene which clears copper from liver cells and causes Wilson  
201 disease when it is defective<sup>25</sup>. This variant was predicted by BigRNA to cause in-frame  
202 skipping of *ATP7B* exon 14 (FPR=0.004, [Fig. 3c](#)), which contains the ATP site and other  
203 critical elements<sup>26</sup>, thus causing a pathogenic loss-of-function. We generated a  
204 homozygous HepG2 line and used RT-PCR to assay the effects of this variant and  
205 confirm the exon skipping predicted by BigRNA ([Fig. 3c](#)).

206

207 Another class of pathogenic splicing variants are cryptic splicing mutations that cause  
208 full intron retention. We evaluated BigRNA on its ability to predict a set of reported  
209 intron retention variants<sup>27</sup>, using nearby common variants as the negative set. We  
210 observed strong performance on classifying these mutations (AUC=0.9, [Fig. 3d](#) and  
211 **Supplementary Fig. S8**), so we next investigated whether BigRNA could predict more  
212 complex splicing aberrations. We focused our attention on a pathogenic non-canonical  
213 splice site variant in the *ABCA4* gene (c.5714+5G>A), which had been found to induce  
214 Stargardt disease by causing skipping of *ABCA4* exon 40<sup>28</sup>. This variant was strongly  
215 predicted to cause both the skipping of exon 40, and retention of intron 40 (FPR=0.008  
216 and <0.04, respectively, [Fig. 3e](#)), but the latter had not been reported, likely due to  
217 technical limitations in the assay<sup>28</sup>. To test this prediction, we edited a retinoblastoma  
218 cell line (WERI-Rb-1) to be homozygous for c.5714+5G>A, and performed RNA  
219 sequencing to capture the full suite of splicing events. This confirmed BigRNA's  
220 predictions that this variant causes a complex set of aberrations that includes partial  
221 skipping of exon 40, as well as retention of intron 40.

222

223

## 224 **Designing splice-switching and expression-increase molecules**

225 The ability of BigRNA to understand regulatory mechanisms affecting splicing and gene  
226 expression may allow it to design therapeutic interventions that rescue pathogenic  
227 variant effects. For this application, we evaluated whether BigRNA could reverse

228 splicing defects by designing steric blocking oligonucleotides (SBOs) – short,  
229 chemically-modified synthetic nucleic acid strands purposed to bind specific RNA  
230 targets to modulate splicing and gene expression. For example, Nusinersen, an FDA  
231 approved SBO, treats spinal muscular atrophy by reversing the skipping of exon 7 in  
232 *SMN2*<sup>29</sup>, thus restoring SMN protein levels and mitigating motor neuron loss and  
233 muscular atrophy. One way to predict the effect of an SBO is to hide the complementary  
234 binding site from the model's input (**Methods**). This approach is an instance of  
235 'zero-shot learning', because no additional task-specific SBO data is used when making  
236 the prediction.

237

238 To evaluate the utility of zero-shot learning for virtual screening, we first evaluated the  
239 ability of BigRNA to re-discover Nusinersen amongst the set of all possible SBOs within  
240 200 base-pairs of *SMN2* exon 7. Strikingly, BigRNA ranked Nusinersen within the top 3  
241 of 437 compounds (**Fig. 4a**). To more systematically evaluate the effectiveness of this  
242 approach, we treated 15 exons in 12 genes with a total of 620 SBOs, and observed a  
243 strong and statistically significant correlation with the predicted and  
244 experimentally-measured exon inclusion levels in all cases ( $r=0.41-0.77$ ,  $p=7e-12$  to  $2e-2$ ,  
245 **Fig. 4b**). For comparison, SpliceAI correlated with experiments in 11/15 exons and the  
246 correlation was lower than BigRNA for 13/15 exons.

247

248 We then used BigRNA to design a novel splice-switching SBO that rescues a pathogenic  
249 splicing defect. Previously, we had reported that a missense variant in the *ATP7B* gene  
250 (c.1934T>G, Met645Arg) leads to Wilson disease by promoting skipping of exon 6, thus  
251 resulting in lowered levels of functional protein and subsequent copper accumulation in  
252 liver cells<sup>25</sup>. We created a disease model of the Met645Arg variant in HepG2 cells, and  
253 used this system to test a set of SBOs targeting the skipped exon (**Methods**). We  
254 observed a strong relationship between the predicted and measured splicing changes  
255 ( $r=0.91$ ,  $p=4.7e-22$ , **Fig. 4c**). The top compound from this assay was predicted to be in  
256 the top 7 of 458 possible compounds by BigRNA. To summarize, BigRNA predicted both  
257 the exon skipping caused by Met645Arg (FPR=0.007) and the restorative effect of the  
258 top experimentally-validated compound (**Fig. 4d**).

259

260 BigRNA's ability to score SBOs has utility in developing therapeutic candidates targeting  
261 extremely rare variants within a constrained budget. First, we evaluated BigRNA's ability  
262 to score SBOs that target a pseudo-exon in the *ATM* gene caused by the rare  
263 c.5763-1050A>G mutation, leading to ataxia-telangiectasia<sup>30</sup>. We observed significant  
264 correlation between the predictions and experimentally observed splicing efficiencies  
265 ( $r=0.64$ ,  $p=3.3e-04$ , **Supplementary Fig. S9**), and ranked the lead therapeutic candidate  
266 in the top 7 of 516 possible compounds. We sought to explore whether similar

267 therapeutic candidates could be developed for other rare splicing diseases. After  
268 curating a set of extremely rare, so-called “N=1”, pathogenic variants from ClinVar  
269 (**Methods**), we used BigRNA to predict which ones are likely to act through exon  
270 skipping while not affecting the core splice donor or acceptor site (**Fig. 4e**), thus  
271 potentially being eligible for SBO remediation. This included synonymous variants,  
272 non-synonymous variants predicted to be tolerated<sup>31</sup>, and variants near splice sites.  
273 One such variant was in intron 22 of *MYO1E*, which is associated with  
274 glomerulosclerosis<sup>32</sup>. While no published mechanism exists for this variant, it was  
275 predicted to cause skipping of exon 23, and the top SBO was predicted to completely  
276 rescue this skipping defect, suggesting that this variant is amenable to personalized  
277 SBO treatment (**Fig. 4f**).

278

279 Owing to BigRNA’s striking ability to help design splice-switching SBOs, we turned to the  
280 more challenging problem of designing SBOs that amplify gene expression. This  
281 requires the model to rank all possible compounds targeting any part of the transcript,  
282 again without any additional training and additionally with no prior knowledge of  
283 inhibitory regions. Due to the greatly increased search space, we first developed a  
284 method to score a large number of compounds in a computationally efficient manner.  
285 For this, we applied a combination of established saliency mapping techniques<sup>33,34</sup> to  
286 evaluate the contribution of each base pair in a transcript on its expression in a given  
287 tissue, and took the minimum contribution score at the SBO binding region as the  
288 ‘inhibitory score’ of each compound (**Methods**). We again benchmarked this scoring on  
289 Nusinersen, reasoning that the skipping of exon 7 and subsequent nonsense-mediated  
290 mRNA decay is a major expression bottleneck. Considering all 26,901 SBOs of length  
291 18, Nusinersen ranked in the top 2.28% (**Supplementary Fig. S10**), suggesting that  
292 BigRNA’s inhibitory scores can be used to identify inhibitory regions, and that this  
293 strategy could have recovered Nusinersen within a tractable screening budget.

294

295 We then sought to systematically assess how well BigRNA could be used to discover  
296 novel therapeutically beneficial expression-increasing SBOs. An example is  
297 Paraoxonase 1 (*PON1*), where variants that decrease expression of the gene or catalytic  
298 activity of the protein have been associated with an increased risk of atherosclerotic  
299 cardiovascular disease<sup>35,36</sup> (ASCVD). In murine models, modulation of *PON1* expression  
300 has been shown to directionally influence the risk of ASCVD and related phenotypes<sup>37–40</sup>,  
301 thus presenting a compelling opportunity for expression-increasing therapeutics. We  
302 used BigRNA to perform large-scale SBO design, experimentally tested the predicted  
303 SBOs in primary human hepatocytes, and identified 10 compounds that showed activity  
304 for increasing *PON1* expression (**Methods**). By using a liver-specific score to rank all  
305 positive compounds, BigRNA showed a strong ability to prioritize expression increase



306 compounds (AUC=0.818, [Fig. 4h](#)). To expand this study, we screened  
307 expression-increasing compounds for *ATP7B* (to benefit a broader population beyond  
308 Met645Arg), as well as *PRRT2* and *SERPING1*, which may confer therapeutic benefits for  
309 benign familial infantile epilepsy<sup>41</sup> and hereditary angioedema<sup>42</sup>. For all three genes,  
310 BigRNA's predictions successfully prioritized expression-increasing SBOs without  
311 requiring any additional training (AUC=0.72-0.85, [Fig. 4h](#)).

## 312 Discussion

313 The rapid evolution of computational models in genomics has enabled the use of  
314 methods that can learn from large-scale genomics data to predict RNA expression from  
315 DNA sequence. Using deep learning to model RNA-seq data and take into account  
316 individual genomic sequence variation, we can enable novel and accelerated discovery  
317 on several drug discovery tasks.

318

319 When we adapted previously published deep learning systems to the drug discovery  
320 tasks that we evaluated, we found that BigRNA performed substantially better overall. It  
321 improved significantly over specialized models like TargetScan<sup>8</sup> and DeepRiPe<sup>7</sup> for  
322 predicting microRNA and RBP binding sites, and was more accurate than SpliceAI<sup>22</sup> at  
323 identifying exon skipping variants as well as designing splice-switching SBOs. BigRNA  
324 could accurately predict pathogenic variants in untranslated regions, matching  
325 specialized models for the 5' and 3' UTRs<sup>15,16</sup>, and improved upon the general-purpose  
326 Enformer model<sup>2</sup>. In cases where BigRNA's performance matched an existing model,  
327 direct modeling of RNA-seq data had distinct advantages. For example, unlike a  
328 previously described ribosomal loading model<sup>15</sup>, BigRNA could predict all classes of  
329 pathogenic mutations in the 5' UTR, and unlike a model of RNA half life<sup>16</sup>, it could predict  
330 that a pathogenic variant acts by changing the polyadenylation site, which reduces the  
331 half-life. Existing methods for predicting splice donor and acceptor strength<sup>22</sup> are  
332 unable to identify correlated splicing events, such as intron retention, but we found that  
333 BigRNA is able to do so. For complex traits, in contrast to traditional fine-mapping  
334 methods that do not provide insight into the mechanistic impact of causal mutations<sup>43</sup>,  
335 BigRNA can make predictions for complex trait heritability contributions from many  
336 different mechanisms that do not exert their effect through a change in protein  
337 structure.

338

339 The ability of BigRNA to learn mechanisms of RNA regulation is reflected by the fact  
340 that it was able to accurately design SBOs that counteract the effects of pathogenic  
341 variants or that increase gene expression, without being provided with a single training  
342 case of an SBO and its effect. Nonetheless, a further avenue of work would include

343 fine-tuning BigRNA by learning from SBO treatment data, such as from the rich  
344 information encoded by SBO-treated RNA-seq samples<sup>44</sup>. Similar approaches can be  
345 used for other therapeutic modalities such as predicting the phenotypic effects of  
346 induced ADAR (adenosine deaminase acting on RNA) editing so that they confer a  
347 similar compensatory effect on splicing or expression<sup>45</sup>, or designing mRNAs that have  
348 increased half-life and translation efficiency.

349

350 Several avenues exist to improve the predictive abilities of BigRNA. The 128bp  
351 resolution of the model can be improved with additional training resources<sup>2</sup>.  
352 Improvements in the speed and scalability of the transformer architecture<sup>46</sup>, coupled  
353 with the use of parameterized upsampling<sup>47</sup> may allow the model to retain a high  
354 context size while producing predictions at single base-pair resolution. Training on  
355 more individuals could improve generalization across genotypes. While the training  
356 procedure takes into account variation from 70 individuals, WGS-paired RNA-seq data is  
357 available for many more GTEx samples, and can be supplemented with additional  
358 datasets<sup>48</sup>. To take into account such a large amount of data, methods have been  
359 developed to prioritize the most informative training points<sup>49</sup>, allowing the training  
360 procedure to scale and effectively learn from extremely large datasets. To explore  
361 improved prediction of differences between individuals, a contrastive training objective  
362 can be used<sup>50,51,52</sup> and predictions can be made for the difference in expression between  
363 two haplotypes<sup>53</sup>.

364

365 Our results show that different drug discovery tasks can be assisted by deep learning.  
366 We believe that BigRNA and deep learning systems like it have the potential to  
367 transform the field of RNA therapeutics.

## 368 Methods

369

### 370 RNA-seq model training

371 We downloaded and aligned RNA-seq data from the GTEx consortium<sup>5</sup> V6 release,  
372 processing all available data from the set of 70 individuals with the most tissue  
373 availability (data from a total of 51 tissues are available, but data availability varies  
374 between individuals). Data was processed using an in-house pipeline (Supplementary  
375 Information 1.2). Each RNA-seq sample was processed into two data tracks: coverage  
376 and junction, where the junction track contains a subset of read counts at splice  
377 junctions. To make the data compatible with the 128bp resolution of the model's  
378 architecture<sup>2</sup>, we applied 128bp-window average-pooling on coverage tracks, and  
379 128bp-window sum-pooling on junction tracks. To incorporate genomic variants from  
380 each individual, we re-aligned the RNA-seq data to match the insertions and deletions  
381 introduced by each individual's haplotype (Supplementary Information 1.2). BigRNA was  
382 trained with a separate output for each sample, so that each output can be  
383 independently learned. We trained BigRNA by minimizing differences between  
384 prediction from both haplotypes and the observed coverage and junction tracks from  
385 RNA-seq (Supplementary Information 1.3, Supplementary Equation S2). In addition to  
386 the individual-specific outputs, we also added individual-agnostic per-tissue outputs to  
387 encourage the model to learn a mapping from genotype to expected expression (where  
388 the expectation is taken across all individuals). Description of all output heads can be  
389 found in Supplementary Data 1. Fig. 1a shows the training pipeline. The same  
390 procedure was used to train an ensemble of 7 models, varying learning rate, degree of  
391 gradient clipping, and the pre-training strategy for each model in the ensemble  
392 (Supplementary Information 1.3, Supplementary Table S1). At inference time, to predict  
393 on a genomic interval, we used shifted intervals to increase the prediction resolution to  
394 64 base pairs, and averaged predictions from both strands (Supplementary Information  
395 1.4, Supplementary Fig. S1, Supplementary Fig. S2).

396

### 397 Fine-tuning on RBP and microRNA datasets

398 After training models on RNA-seq dataset, we further fine-tuned models on RBP and  
399 microRNA datasets. The RBP dataset was constructed by downloading eCLIP data<sup>6</sup>  
400 from ENCODE<sup>54</sup> (Supplementary Information 1.2.2). The microRNA dataset was  
401 generated by processing CLIP-Seq data from 12 cell lines (Supplementary Information  
402 1.2.3). We fine-tuned the model by first updating weights of the last layer for 10 epochs,  
403 then updating weights of the entire model for another 30 epochs (Supplementary  
404 Information 1.3). Description of all output heads can be found in Supplementary Data 2.

405

#### 406 Held-out performance on gene expression and differential gene expression

407 We selected protein coding genes that are completely outside the training and validation  
408 set, and which overlap at least one interval in the test set. Predictions and targets were  
409 mean-aggregated over all exons for each gene to yield one value per gene  
410 (Supplementary Information 2.1). For each tissue, we compute the correlation between  
411 prediction and target across all genes. To evaluate performance on differential gene  
412 expression, we constructed all pairwise comparisons between tissues, and computed  
413 the  $\log_2$  fold-change using the predicted and target coverage data (Supplementary  
414 Information 2.2). For each tissue pair we computed the correlation between the  
415 predicted and target  $\log_2$  fold-changes across all genes.

416

#### 417 Visualizing prediction on SLC7A8

418 Sequence of SLC7A8 gene was obtained from hg38 genome build with Gencode v29  
419 annotation. We averaged output heads that correspond to coverage in the “Brain -  
420 Hypothalamus” tissue to obtain BigRNA prediction for visualization (Supplementary  
421 Information 2.3).

422

#### 423 Held-out performance on RBP

424 Processed RBP peaks were obtained from ENCODE<sup>54</sup>, and processed into low  
425 resolution binary labels by taking into account noise in the data [Supplementary  
426 Information 1.2.2, Supplementary Equation S8]. We selected protein coding genes that  
427 are completely outside the training and validation set, and made predictions using  
428 BigRNA and DeepRiPe<sup>7</sup>. Both BigRNA and DeepRiPe predictions were averaged within  
429 each 128-bp window (Supplementary Information 2.4). Fig. 1g shows the average  
430 precision performance of BigRNA and DeepRiPe.

431

#### 432 Held-out performance on microRNA

433 The microRNA dataset was generated by processing CLIP-Seq data from 12 cell lines  
434 (Supplementary Information 1.2.3). The called peaks were further processed into low  
435 resolution binary labels by taking into account noise in the data (Supplementary  
436 Equation S9). We selected protein coding genes that are completely outside the training  
437 and validation set, and made predictions using BigRNA and TargetScan<sup>8</sup>. Both BigRNA  
438 and TargetScan predictions were averaged within each 128-bp window (Supplementary  
439 Information 2.5). Fig 1h shows the au-ROC performance of BigRNA and TargetScan.

440

#### 441 Benchmarking variant effect predictions on pathogenic variants

442 Pathogenic or likely pathogenic (P/LP) UTR SNVs were obtained from Bohn et al<sup>13</sup>.  
443 Putative benign SNVs located in the same UTR were obtained from ClinVar, if they were  
444 classified as benign or likely benign (B/LB), and gnomAD v3 if their global allele

445 frequency was greater than 0.001<sup>55</sup> (Supplementary Information 3.1.1). For the 5' UTR  
446 benchmark, we predicted the effect of the variant using BigRNA, Enformer, and  
447 FramePool and took the absolute value of the variant effect scores. For the 3' UTR  
448 benchmark, we evaluated BigRNA, Enformer, and Saluki and again, took the absolute  
449 values of the variant effect scores (Supplementary Information 3.1.2, Supplementary  
450 Equation S10-12). In addition to Fig. 2d, Supplementary Fig. S3 shows the ROC curve  
451 and PRC of classification performance of all models. To compare models, we  
452 performed permutation tests with 10000 permutations (Supplementary Information  
453 3.1.3). Variants of uncertain significance (VUS) in the UTRs of the genes that were in the  
454 benchmark were extracted as described in Supplementary Information 3.1.4.

455

#### 456 Predicting the impact of disrupting polyadenylation sites

457 To evaluate BigRNA's ability to predict poly(A) sites, we conducted an in-silico 11 bp  
458 N-mask tiling analysis across each poly(A) region. Poly(A) sites (PAS) from 200 genes  
459 were obtained from PolyASite 2.0<sup>56</sup> (Supplementary Information 3.3). For each PAS, we  
460 expanded the site by  $\pm 100$  bp to cover proximal regulatory elements, resulting in 206 bp  
461 regions. We subsequently N-masked 11 bp tiles across the region and compared  
462 BigRNA predictions for the N-masked sequences (mutant) and the poly(A) signal  
463 sequence (wildtype). The BigRNA predictions were based on the mean of the individual  
464 sample RNA-seq coverage heads across all tissue types (Supplementary Information  
465 3.3). For the *NAA10* PAS and its surrounding 100 bp context, we performed saturation  
466 mutagenesis by point-mutating every reference nucleic acid base to every other nucleic  
467 acid base. Similar to the poly(A) site analysis, we carried out predictions using the  
468 BigRNA model to assess the impact of these mutations on gene expression.

469

#### 470 Expression quantitative trait loci (eQTLs) and linkage disequilibrium (LD) estimation for 471 *PON1* variants

472 The four variants with known expression effect were rs705379 (chr7:95324583:G:A),  
473 rs854571 (chr7:95325307:T:C), rs854572 (chr7:95325384:C:G) and rs3735590  
474 (chr7:95298183:G:A). The eQTL and normalized effect size of these variants on *PON1*  
475 liver tissue expression were obtained from the GTEx eQTL Calculator . The LD  $R^2$  values  
476 between variants was calculated using the NIH LDmatrix tool with the GBR population  
477 selected.

478

#### 479 Classifying expression quantitative trait loci (eQTLs) versus matched controls

480 To construct a benchmark dataset from confidently fine-mapped eQTLs, variants with a  
481 posterior inclusion probability of 0.5 or greater (indicating that they are the most likely  
482 causal variant in the credible set) were selected from eQTLGen statistical fine-mapping  
483 of expression modulating variants in GTEx v8<sup>19</sup>. eQTLs within 50kbp of the transcription

484 start site of the primary or most highly expressed transcript for the reported eGene were  
485 selected to ensure that deep learning models would have sufficient genomic context to  
486 accurately predict changes in expression. For each eQTL we selected a matched  
487 negative control variant from the same effector gene (eGene) which was not associated  
488 with its expression ( $P > 0.05$ ) in any tissue and within 10% of the eQTL's minor allele  
489 frequency and 10kbp of the eQTL's genomic position. This resulted in a dataset of 1374  
490 eQTL variants and 1162 matched negative controls.

491

#### 492 Classifying variants that cause intron retention

493 Variants that cause full intron retention were manually curated from splicing variants  
494 downloaded from the SPCards database<sup>27</sup>. A matching set of variants that do not cause  
495 intron retention were processed from gnomAD<sup>55</sup> (Supplementary Information 4.1.1). For  
496 each variant, we use BigRNA to predict the relative coverage between intron and the two  
497 flanking exons, and compute the score as the ratio between wild-type and mutant-type,  
498 aggregated across models in ensemble (Supplementary Information 4.1.2,  
499 Supplementary Equation S14-16).

500

#### 501 Classifying variants that cause exon skipping

502 For each mutation in the MaPSy dataset<sup>21</sup>, we computed the splicing odds ratio and  
503 confidence interval using the reported readout from both in-vitro and in-vivo assays, to  
504 create a high confidence binary label on skipping versus non-skipping at splicing levels  
505 ranging from 50% to 10% (Supplementary Information 4.2.1, Supplementary Equation  
506 S17-18). For each mutation, we used BigRNA to predict the difference in junction counts  
507 between wild-type and mutant-type, normalized by exon, and aggregate across models  
508 in ensemble (Supplementary Information 4.2.2, Supplementary Equation S19). Fig 3a  
509 shows ROC curve of classification performance on skipping versus non-skipping at 50%  
510 splicing level. For model comparison (Supplementary Fig. S7), we performed  
511 permutation tests with 100,000 permutations.

512

#### 513 Predicting the effect of splice-switching SBOs

514 To obtain the relative ranking of Nusinersen, we ranked all possible SBOs of length 18  
515 within 200 base pairs of exon 7 of SMN2 (Supplementary Information 5.1). We used  
516 RT-PCR to measure the Percentage Spliced In (PSI) values for 15 exons in the HEK293T  
517 cell line, and compared the measured PSI with the predicted SBO effect of SpliceAI and  
518 BigRNA using the Spearman Correlation metric (Supplementary Information 5.2). We  
519 repeated the above evaluation for SBOs targeting Met645Arg; here we edited HepG2  
520 cells to introduce the c.1934T>G Met645Arg variant, and screened a library of 55 SBOs  
521 by qPCR. Spearman correlation was computed between BigRNA predictions and the  
522 experimentally observed *ATP7B* expression levels (Supplementary Information 5.3). The

523 same evaluation was carried out on published data of SBOs designed to skip a  
524 pseudo-exon created by the c.5763-1050A>G variant in ATM<sup>30</sup>.

525

526 The set of “N=1” variants was created by selecting pathogenic or likely pathogenic  
527 variants (ClinVar) from genes that are exclusively associated with autosomal recessive  
528 disorders (OMIM). BigRNA predictions were made for SNVs with very low estimated  
529 worldwide prevalence (n=1582, GnomAD) and we curated synonymous, tolerated  
530 missense (SIFT) and intronic variants (excluding the core dinucleotides) for their  
531 mechanisms of pathogenicity (Supplementary Information 5.5). All possible 20-mers  
532 within 200 bp of MYO1E exon 23 were scored for their ability to remedy the effect of the  
533 c.2481-12A>G variant, and we visualized the predictions for the highest ranked SBO.

534

### 535 Predicting the effect of expression increase SBOs

536 Expression increase can occur through a variety of mechanisms, and SBOs can be  
537 designed anywhere in the gene. By applying a combination of established saliency  
538 mapping techniques<sup>33,34</sup>, we evaluated the contribution of each base pair in a transcript  
539 to the expression of the related gene in the relevant tissue, yielding a sensitivity score  
540 for each base pair's impact on gene expression levels, called the Inhibitory Score  
541 (Supplementary Information 1.5). This per-base-pair score was then used to rank SBOs  
542 by taking the minimum score of any overlapping base-pair (Supplementary Information  
543 5.6.2). For the Nusinersen ranking evaluation, we used the BigRNA Inhibitory Score to  
544 score all candidate SBOs of length 18 targeting the entirety of the gene body of SMN2.  
545 The same process was applied to expression increase SBOs identified from screens of  
546 PON1, ATPB, PRRT2, and SERPING1. Scores between hit SBOs and the background of all  
547 candidate SBOs were compared with a Mann-Whitney U-Test.

548

### 549 **Data Availability**

550 Data and code to be made available upon peer review.

551

### 552 **References**

553 1. Beer, M. A. & Tavazoie, S. Predicting gene expression from sequence. *Cell* **117**, 185–198

554 (2004).

555 2. Avsec, Ž. *et al.* Effective gene expression prediction from sequence by integrating long-range

556 interactions. *Nat. Methods* **18**, 1196–1203 (2021).

557 3. Wainberg, M., Merico, D., DeLong, A. & Frey, B. J. Deep learning in biomedicine. *Nat.*

- 558 *Biotechnol.* **36**, 829–838 (2018).
- 559 4. The FANTOM Consortium and the RIKEN PMI and CLST (DGT). A promoter-level  
560 mammalian expression atlas. *Nature* **507**, 462–470 (2014).
- 561 5. The GTEx Consortium *et al.* The GTEx Consortium atlas of genetic regulatory effects across  
562 human tissues. *Science* **369**, 1318–1330 (2020).
- 563 6. Van Nostrand, E. L. *et al.* A large-scale binding and functional map of human RNA-binding  
564 proteins. *Nature* **583**, 711–719 (2020).
- 565 7. Ghanbari, M. & Ohler, U. Deep neural networks for interpreting RNA-binding protein target  
566 preferences. *Genome Res.* **30**, 214–226 (2020).
- 567 8. Agarwal, V., Bell, G. W., Nam, J.-W. & Bartel, D. P. Predicting effective microRNA target sites  
568 in mammalian mRNAs. *eLife* **4**, e05005 (2015).
- 569 9. Jumper, J. *et al.* Highly accurate protein structure prediction with AlphaFold. *Nature* **596**,  
570 583–589 (2021).
- 571 10. Buel, G. R. & Walters, K. J. Can AlphaFold2 predict the impact of missense mutations on  
572 structure? *Nat. Struct. Mol. Biol.* **29**, 1–2 (2022).
- 573 11. Wu, Y. *et al.* Improved pathogenicity prediction for rare human missense variants. *Am. J.*  
574 *Hum. Genet.* **108**, 2389 (2021).
- 575 12. Kircher, M. *et al.* A general framework for estimating the relative pathogenicity of human  
576 genetic variants. *Nat. Genet.* **46**, 310–315 (2014).
- 577 13. Bohn, E., Lau, T. T. Y., Wagih, O., Masud, T. & Merico, D. A curated census of  
578 pathogenic and likely pathogenic UTR variants and evaluation of deep learning models for  
579 variant effect prediction. *Front. Mol. Biosci.* **10**, 1257550 (2023).
- 580 14. Johnston, J. J. *et al.* NAA10 polyadenylation signal variants cause syndromic  
581 microphthalmia. *J. Med. Genet.* **56**, 444–452 (2019).
- 582 15. Karollus, A., Avsec, Ž. & Gagneur, J. Predicting mean ribosome load for 5'UTR of any  
583 length using deep learning. *PLOS Comput. Biol.* **17**, e1008982 (2021).



- 584 16. Agarwal, V. & Kelley, D. R. The genetic and biochemical determinants of mRNA  
585 degradation rates in mammals. *Genome Biol.* **23**, 245 (2022).
- 586 17. Hino, M. *et al.* The +1,506 (A>C) Mutation in the 3' Untranslated Region Affects  $\beta$ -Globin  
587 Expression. *Hemoglobin* **36**, 399–406 (2012).
- 588 18. Leviev, I. & James, R. W. Promoter Polymorphisms of Human Paraoxonase *PON1* Gene  
589 and Serum Paraoxonase Activities and Concentrations. *Arterioscler. Thromb. Vasc. Biol.* **20**,  
590 516–521 (2000).
- 591 19. Kerimov, N. *et al.* A compendium of uniformly processed human gene expression and  
592 splicing quantitative trait loci. *Nat. Genet.* **53**, 1290–1299 (2021).
- 593 20. Liu, M.-E. *et al.* A functional polymorphism of *PON1* interferes with microRNA binding to  
594 increase the risk of ischemic stroke and carotid atherosclerosis. *Atherosclerosis* **228**,  
595 161–167 (2013).
- 596 21. Soemedi, R. *et al.* Pathogenic variants that alter protein code often disrupt splicing. *Nat.*  
597 *Genet.* **49**, 848–855 (2017).
- 598 22. Jaganathan, K. *et al.* Predicting Splicing from Primary Sequence with Deep Learning.  
599 *Cell* **176**, 535-548.e24 (2019).
- 600 23. Grønning, A. G. B. *et al.* DeepCLIP: predicting the effect of mutations on protein–RNA  
601 binding with deep learning. *Nucleic Acids Res.* gkaa530 (2020) doi:10.1093/nar/gkaa530.
- 602 24. Waddell, L. *et al.* Medium-chain acyl-CoA dehydrogenase deficiency:  
603 Genotype–biochemical phenotype correlations. *Mol. Genet. Metab.* **87**, 32–39 (2006).
- 604 25. Merico, D. *et al.* ATP7B variant c.1934T > G p.Met645Arg causes Wilson disease by  
605 promoting exon 6 skipping. *NPJ Genomic Med.* **5**, 16 (2020).
- 606 26. Loudianos, G. *et al.* Abnormal mRNA splicing resulting from consensus sequence  
607 splicing mutations of ATP7B: ATP7B ABNORMAL SPLICING IN WILSON DISEASE. *Hum.*  
608 *Mutat.* **20**, 260–266 (2002).
- 609 27. Li, K. *et al.* Performance evaluation of differential splicing analysis methods and splicing

- 610 analytics platform construction. *Nucleic Acids Res.* **50**, 9115–9126 (2022).
- 611 28. Sangermano, R. *et al.* ABCA4 midigenes reveal the full splice spectrum of all reported  
612 noncanonical splice site variants in Stargardt disease. *Genome Res.* **28**, 100–110 (2018).
- 613 29. Wurster, C. D. & Ludolph, A. C. Nusinersen for spinal muscular atrophy. *Ther. Adv.*  
614 *Neurol. Disord.* **11**, 1756285618754459 (2018).
- 615 30. Kim, J. *et al.* A framework for individualized splice-switching oligonucleotide therapy.  
616 *Nature* **619**, 828–836 (2023).
- 617 31. Ng, P. C. SIFT: predicting amino acid changes that affect protein function. *Nucleic Acids*  
618 *Res.* **31**, 3812–3814 (2003).
- 619 32. Domingo-Gallego, A. *et al.* Clinical utility of genetic testing in early-onset kidney disease:  
620 seven genes are the main players. *Nephrol. Dial. Transplant.* **37**, 687–696 (2022).
- 621 33. Majdandzic, A., Rajesh, C. & Koo, P. K. Correcting gradient-based interpretations of  
622 deep neural networks for genomics. *Genome Biol.* **24**, 109 (2023).
- 623 34. Smilkov, D., Thorat, N., Kim, B., Viégas, F. & Wattenberg, M. SmoothGrad: removing  
624 noise by adding noise. Preprint at <http://arxiv.org/abs/1706.03825> (2017).
- 625 35. James, R. W. *et al.* Promoter polymorphism T(-107)C of the paraoxonase PON1 gene is  
626 a risk factor for coronary heart disease in type 2 diabetic patients. *Diabetes* **49**, 1390–1393  
627 (2000).
- 628 36. Wang, M., Lang, X., Zou, L., Huang, S. & Xu, Z. Four genetic polymorphisms of  
629 paraoxonase gene and risk of coronary heart disease: A meta-analysis based on 88  
630 case–control studies. *Atherosclerosis* **214**, 377–385 (2011).
- 631 37. Shih, D. M. *et al.* Mice lacking serum paraoxonase are susceptible to organophosphate  
632 toxicity and atherosclerosis. *Nature* **394**, 284–287 (1998).
- 633 38. Litvinov, D., Mahini, H. & Garelnabi, M. Antioxidant and anti-inflammatory role of  
634 paraoxonase 1: implication in arteriosclerosis diseases. *North Am. J. Med. Sci.* **4**, 523–532  
635 (2012).

- 636 39. Tward, A. *et al.* Decreased atherosclerotic lesion formation in human serum  
637 paraoxonase transgenic mice. *Circulation* **106**, 484–490 (2002).
- 638 40. Mackness, B., Quarck, R., Verreth, W., Mackness, M. & Holvoet, P. Human  
639 Paraoxonase-1 Overexpression Inhibits Atherosclerosis in a Mouse Model of Metabolic  
640 Syndrome. *Arterioscler. Thromb. Vasc. Biol.* **26**, 1545–1550 (2006).
- 641 41. Ebrahimi-Fakhari, D., Saffari, A., Westenberger, A. & Klein, C. The evolving spectrum of  
642 *PRRT2* -associated paroxysmal diseases. *Brain* **138**, 3476–3495 (2015).
- 643 42. Ponard, D. *et al.* SERPING1 mutation update: Mutation spectrum and C1 Inhibitor  
644 phenotypes. *Hum. Mutat.* **41**, 38–57 (2020).
- 645 43. The 1000 Genomes Project Consortium *et al.* A global reference for human genetic  
646 variation. *Nature* **526**, 68–74 (2015).
- 647 44. Holgersen, E. M. *et al.* Transcriptome-Wide Off-Target Effects of Steric-Blocking  
648 Oligonucleotides. *Nucleic Acid Ther.* **31**, 392–403 (2021).
- 649 45. Merkle, T. *et al.* Precise RNA editing by recruiting endogenous ADARs with antisense  
650 oligonucleotides. *Nat. Biotechnol.* **37**, 133–138 (2019).
- 651 46. Dao, T. FlashAttention-2: Faster Attention with Better Parallelism and Work Partitioning.  
652 (2023) doi:10.48550/ARXIV.2307.08691.
- 653 47. Ronneberger, O., Fischer, P. & Brox, T. U-Net: Convolutional Networks for Biomedical  
654 Image Segmentation. Preprint at <http://arxiv.org/abs/1505.04597> (2015).
- 655 48. Roadmap Epigenomics Consortium *et al.* Integrative analysis of 111 reference human  
656 epigenomes. *Nature* **518**, 317–330 (2015).
- 657 49. Mindermann, S. *et al.* Prioritized Training on Points that are Learnable, Worth Learning,  
658 and Not Yet Learnt. (2022) doi:10.48550/ARXIV.2206.07137.
- 659 50. Chopra, S., Hadsell, R. & LeCun, Y. Learning a Similarity Metric Discriminatively, with  
660 Application to Face Verification. in *2005 IEEE Computer Society Conference on Computer*  
661 *Vision and Pattern Recognition (CVPR'05)* vol. 1 539–546 (IEEE, 2005).

- 662 51. Huang, C. *et al.* *Personal transcriptome variation is poorly explained by current genomic*  
663 *deep learning models.* <http://biorxiv.org/lookup/doi/10.1101/2023.06.30.547100> (2023)  
664 doi:10.1101/2023.06.30.547100.
- 665 52. Sasse, A. *et al.* *How far are we from personalized gene expression prediction using*  
666 *sequence-to-expression deep neural networks?*  
667 <http://biorxiv.org/lookup/doi/10.1101/2023.03.16.532969> (2023)  
668 doi:10.1101/2023.03.16.532969.
- 669 53. Castel, S. E. *et al.* *A vast resource of allelic expression data spanning human tissues.*  
670 *Genome Biol.* **21**, 234 (2020).
- 671 54. Luo, Y. *et al.* *New developments on the Encyclopedia of DNA Elements (ENCODE) data*  
672 *portal.* *Nucleic Acids Res.* **48**, D882–D889 (2020).
- 673 55. Chen, S. *et al.* *A genome-wide mutational constraint map quantified from variation in*  
674 *76,156 human genomes.* <http://biorxiv.org/lookup/doi/10.1101/2022.03.20.485034> (2022)  
675 doi:10.1101/2022.03.20.485034.
- 676 56. Herrmann, C. J. *et al.* *PolyASite 2.0: a consolidated atlas of polyadenylation sites from 3'*  
677 *end sequencing.* *Nucleic Acids Res.* gkz918 (2019) doi:10.1093/nar/gkz918.

## 678 Acknowledgements

679 We thank David Kelley for advice, Janine Truong for editing figures and reviewing the  
680 manuscript, and Laurence MacPhie for reviewing the manuscript. We also thank Daniele Merico  
681 for help in conceiving of the appropriate benchmarks, and Tim Yu for suggesting we include  
682 results for ultra-rare variants.

## 683 Author Information

### 684 Authors and Affiliations

#### 685 Deep Genomics, Toronto, Canada

686 Albi Celaj, Alice Jiexin Gao , Tammy T.Y. Lau, Erle M. Holgersen, Alston Lo, Varun Lodaya,  
687 Christopher B. Cole, Robert E. Denroche, Carl Spickett, Omar Wagih, Pedro O. Pinheiro,

688 Parth Vora, Pedrum Mohammadi-Shemirani, Steve Chan, Zach Nussbaum, Nicole Zhang,  
689 Helen Zhu, Easwaran Ramamurthy, Bhargav Kanuparthi, Michael Iacocca, Diane Ly, Ken  
690 Kron, Marta Verby, Kahlin Cheung-Ong, Zvi Shalev, Brandon Vaz, Sakshi Bhargava,  
691 Farhan Yusuf, Sharon Samuel, Sabriyeh Alibai, Zahra Baghestani, Xinwen He, Kirsten  
692 Krastel, Oladipo Oladapo, Amrudha Mohan, Arathi Shanavas, Magdalena Bugno,  
693 Jovanka Bogojeski, Frank Schmitges, Carolyn Kim, Solomon Grant, Rachana Jayaraman,  
694 Tehmina Masud, Amit Deshwar, Shreshth Gandhi, Brendan J. Frey

## 695 **Contributions**

696 A.C., A.J.G., and B.F. initiated the project. A.C., A.J.G., T.T.Y.L., E.M.H., and C.B.C. conceived of  
697 the study and designed analyses. A.C., P.O.P. and Z.N. designed the model. A.J.G., A.L., V.L., and  
698 S.C. helped implement and improve the model. A.C., X.Z., P.V., and H.Z. processed the training  
699 data. A.J.G., T.T.Y.L., E.M.H., A.L., V.L., C.B.C., R.E.D., O.W., P.V., E.R., and B.K. performed  
700 benchmarking and downstream analyses. P.V., P.M.S, M.I., E.R., C.K., and S.Gr. aided with  
701 benchmarking. E.M.H., V.L., P.V., and R.J. processed experimental data. C.S., D.L., K.K., M.V.,  
702 K.C.O, Z.S., B.V., S.B., F.Y., S.S., S.A., Z.B., X.H., K.K., O.O., A.M., A.S., M.B., J.B., and F.S. performed  
703 validation experiments; T.M., A.D., S.Gh., and B.F. supervised the study

## 704 **Ethics Declaration**

### 705 **Competing interests**

706 All listed authors are present or past employees of Deep Genomics Inc. This study received  
707 funding from Deep Genomics in the form of salary support and covering of computational  
708 costs. The founder was involved in the decision to submit for publication.

## 709 **Supplementary Information**

710 In a separate document.

## 711 Figures

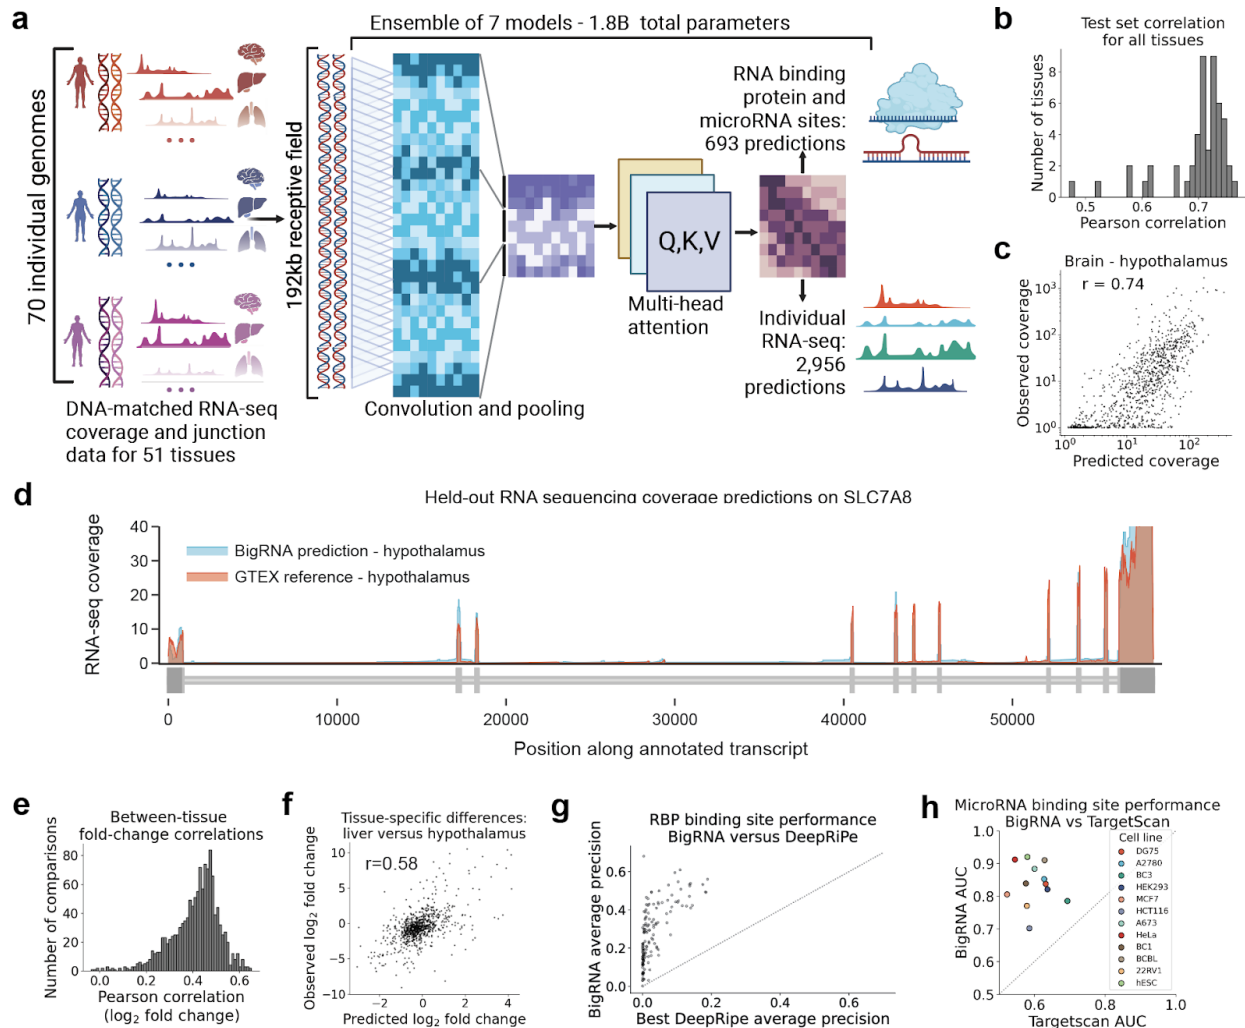

712

713 **Figure 1. BigRNA accurately predicts tissue-specific RNA expression of unseen sequences.**

714 **a.** A schematic of BigRNA's training. BigRNA was trained on the genomes of 70 individuals, to  
 715 predict a total of 2,956 RNA-seq datasets over 51 tissues, plus 693 datasets corresponding to  
 716 RNA binding protein and microRNA sites. **b.** Distribution of correlations between predicted and  
 717 measured RNA-seq coverage in exonic regions for genes held-out during training (averaged  
 718 across individuals). **c.** Correlation between predicted and measured RNA-seq coverage for the  
 719 hypothalamus samples. **d.** Predicted versus measured coverage for *SLC7A8*, averaged across  
 720 hypothalamus samples for all individuals. **e.** Distribution of correlations between predicted and  
 721 measured fold-change (pearson  $r$ ) for all pairwise comparisons across 51 tissues. **f.**  
 722 Fold-change in gene coverage between liver and hypothalamus. **g.** Comparison of BigRNA and  
 723 a previously published method, DeepRipe, for predicting the binding sites of 98 RNA binding  
 724 proteins across 2 cell lines (142 total experiments). **h.** Comparison of BigRNA and a previously  
 725 published method, TargetScan, for predicting microRNA binding sites for 12 cell lines.

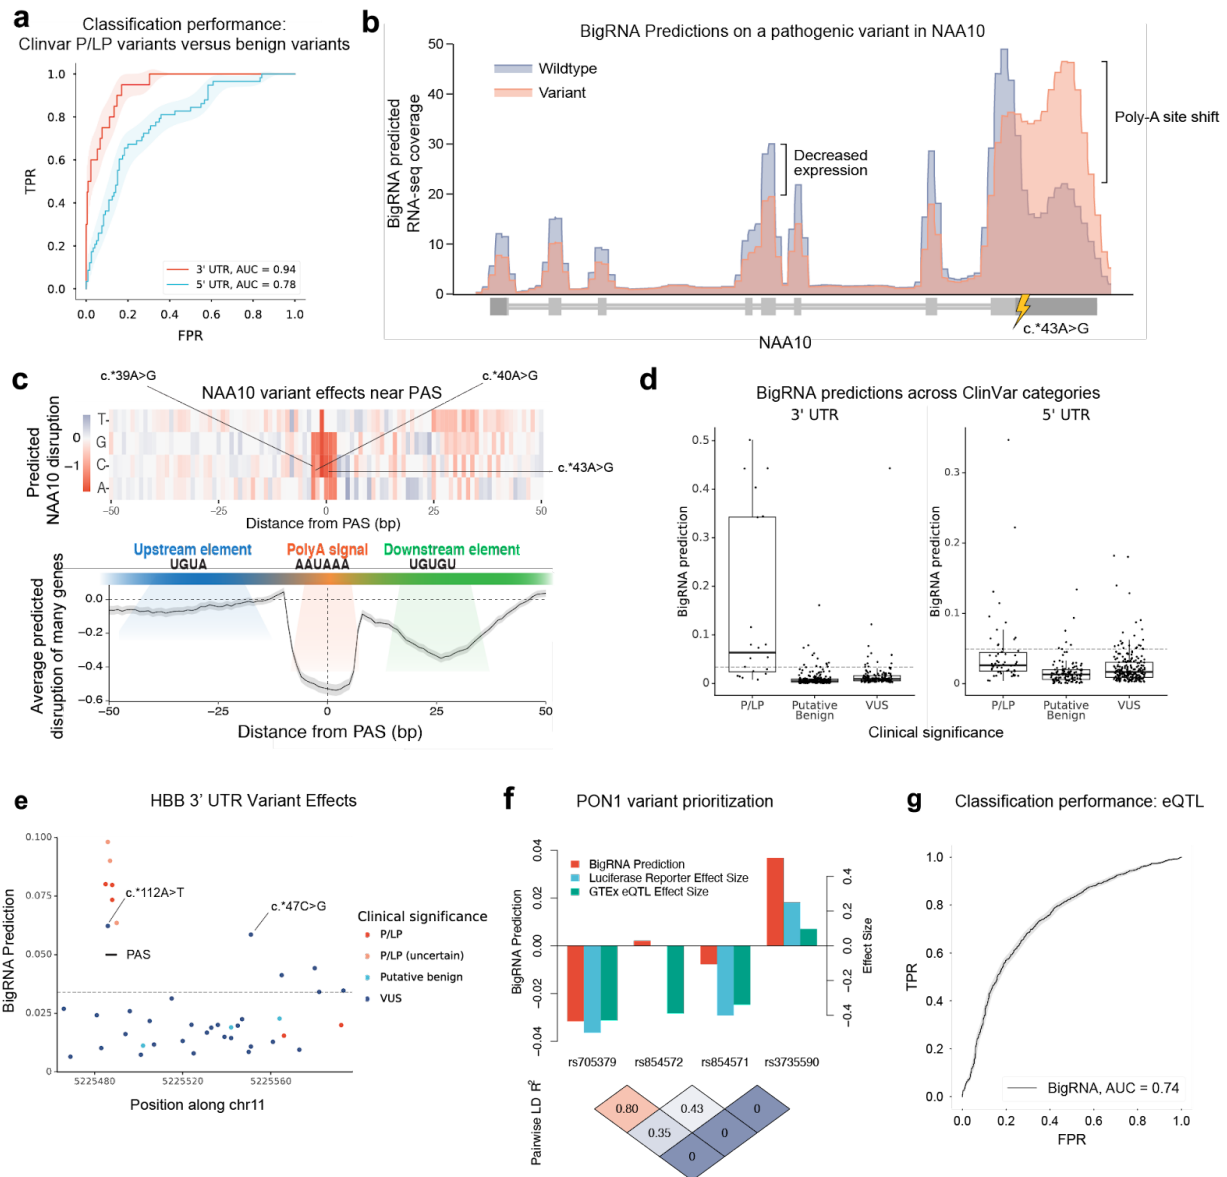

726

**727 Figure 2. BigRNA predicts the effects of pathogenic expression-modulating variants**

728 **a.** Performance of BigRNA on classifying P/LP variants from putative benign variants in the 3'  
 729 UTR and 5' UTR. **b.** RNA-seq coverage predictions for the effects of a pathogenic variant in the 3'  
 730 UTR of NAA10 (NM\_003491.4), averaged across all individuals and all tissue types. **c.** Top:  
 731 BigRNA predictions showing the change in expression for all possible point mutations around  
 732 the polyadenylation site (PAS) of NAA10. Three variants previously identified as impacting the  
 733 PAS are labeled. Bottom: Relationship between the change in expression predicted by BigRNA  
 734 from ablating regions around the PAS relative to the distance from the PAS for 200 human  
 735 poly(A) signal sequences selected from PolyASite 2.0. **d.** The distribution of BigRNA scores for  
 736 P/LP variants, putative benign variants, and VUS variants from ClinVar for genes included in the  
 737 UTR benchmarks. The dashed line in both plots (left,  $y = 0.0341$ ; right,  $y = 0.0494$ ) represents

738 the threshold of classifying P/LP from putative benign variants at an FPR of 5% in each of the  
739 benchmark datasets. **e.** BigRNA predictions for variants of varying clinical significance in *HBB*.  
740 The dashed line represents the threshold of classifying P/LP from putative benign variants at a  
741 5% FPR in the 3' UTR ( $y = 0.0341$ ). The two highest scoring VUS variants in this gene are  
742 annotated. **f.** Top: Comparing BigRNA predicted effects to GTEx eQTL effect size and results of  
743 a luciferase reporter assay for four variants suspected to impact PON1 expression. Bottom:  
744 Estimated linkage disequilibrium between variants. **g.** Performance of BigRNA at distinguishing  
745 fine-mapped expression quantitative trait loci (eQTLs) from controls matched by effector gene  
746 (eGene), distance to the transcription start site of the eGene, and minor allele frequency.



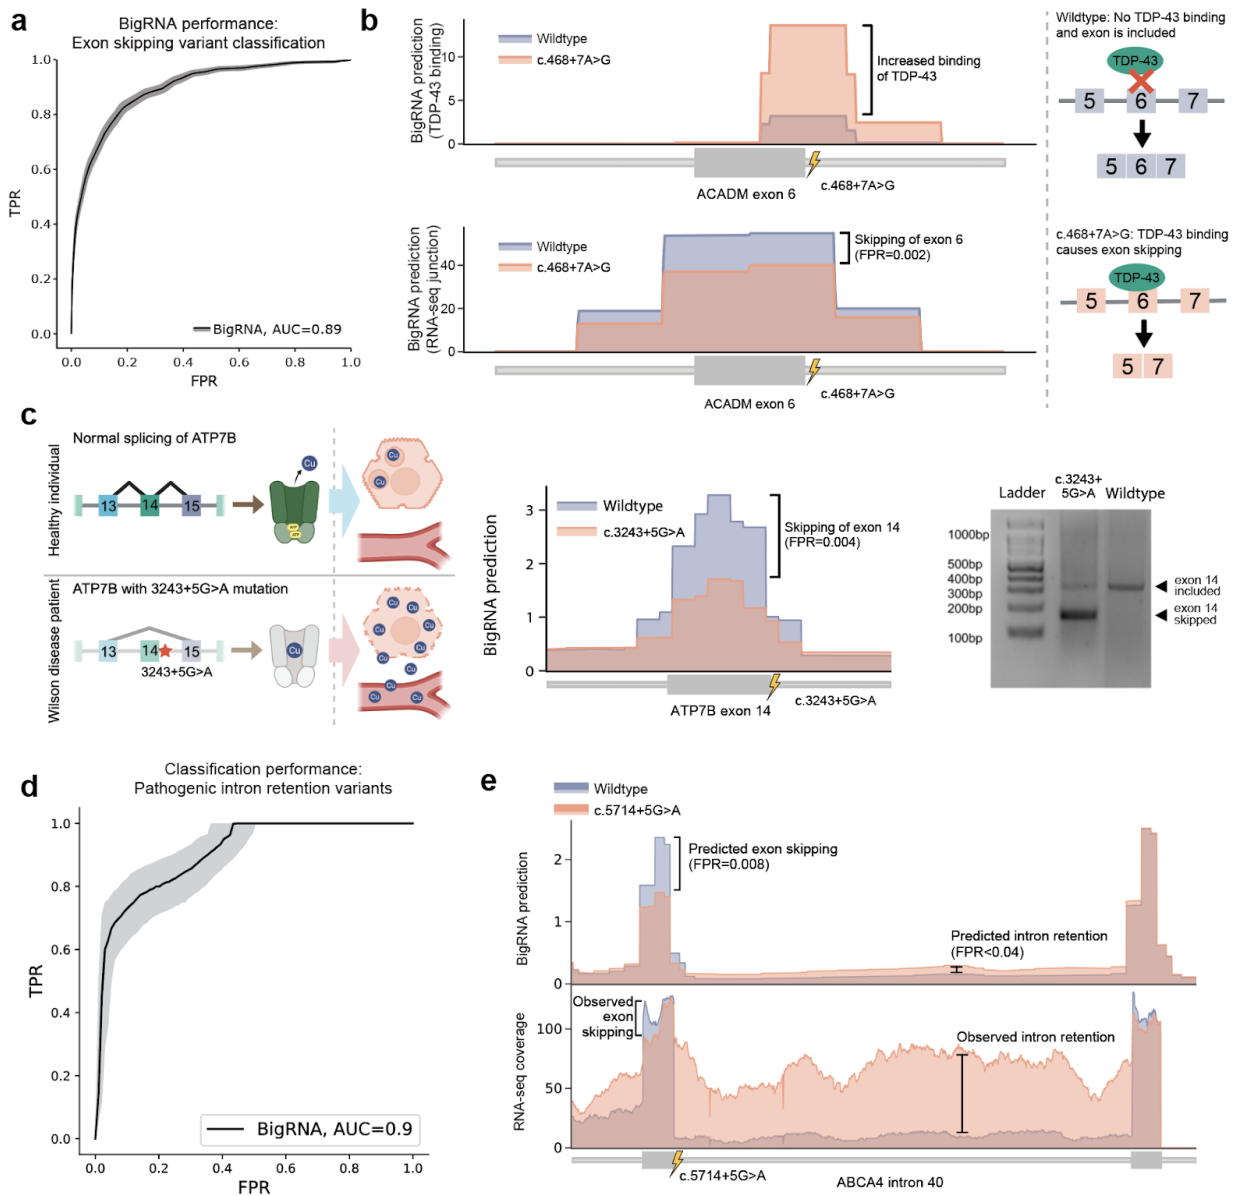

747

748 **Figure 3. BigRNA captures the effect of variants on splicing.**

749 **a.** BigRNA performance on classifying exonic variants that result in exon skipping by at least  
 750 50%, from exonic variants that do not cause skipping, both obtained from MaPSy. **b.** BigRNA  
 751 predicts that the c.468+7A>G variant will result in increased TDP-43 binding and skipping of  
 752 *ACADM* exon 6. **c.** The *ATP7B* VUS c.3243+5G>A is predicted by BigRNA to cause in-frame  
 753 skipping of exon 14. This results in reduced levels of functional ATP7B protein, leading to  
 754 copper buildup in the cell. Right: An RT-PCR in HepG2 cells edited to be homozygous for  
 755 c.3243+5G>A confirms the expected fragment from exon skipping. **d.** BigRNA performance on  
 756 classifying variants that cause intron retention (n = 25) from a set of matched variants that do  
 757 not impact splicing (n = 63). **e.** Top: BigRNA coverage predictions of the c.5714+5G>A variant in

758 *ABCA4*. Bottom: RNA-seq of wildtype WERI cells and WERI cells edited to be homozygous for  
759 the variant confirm both exon skipping and intron retention effects.

760

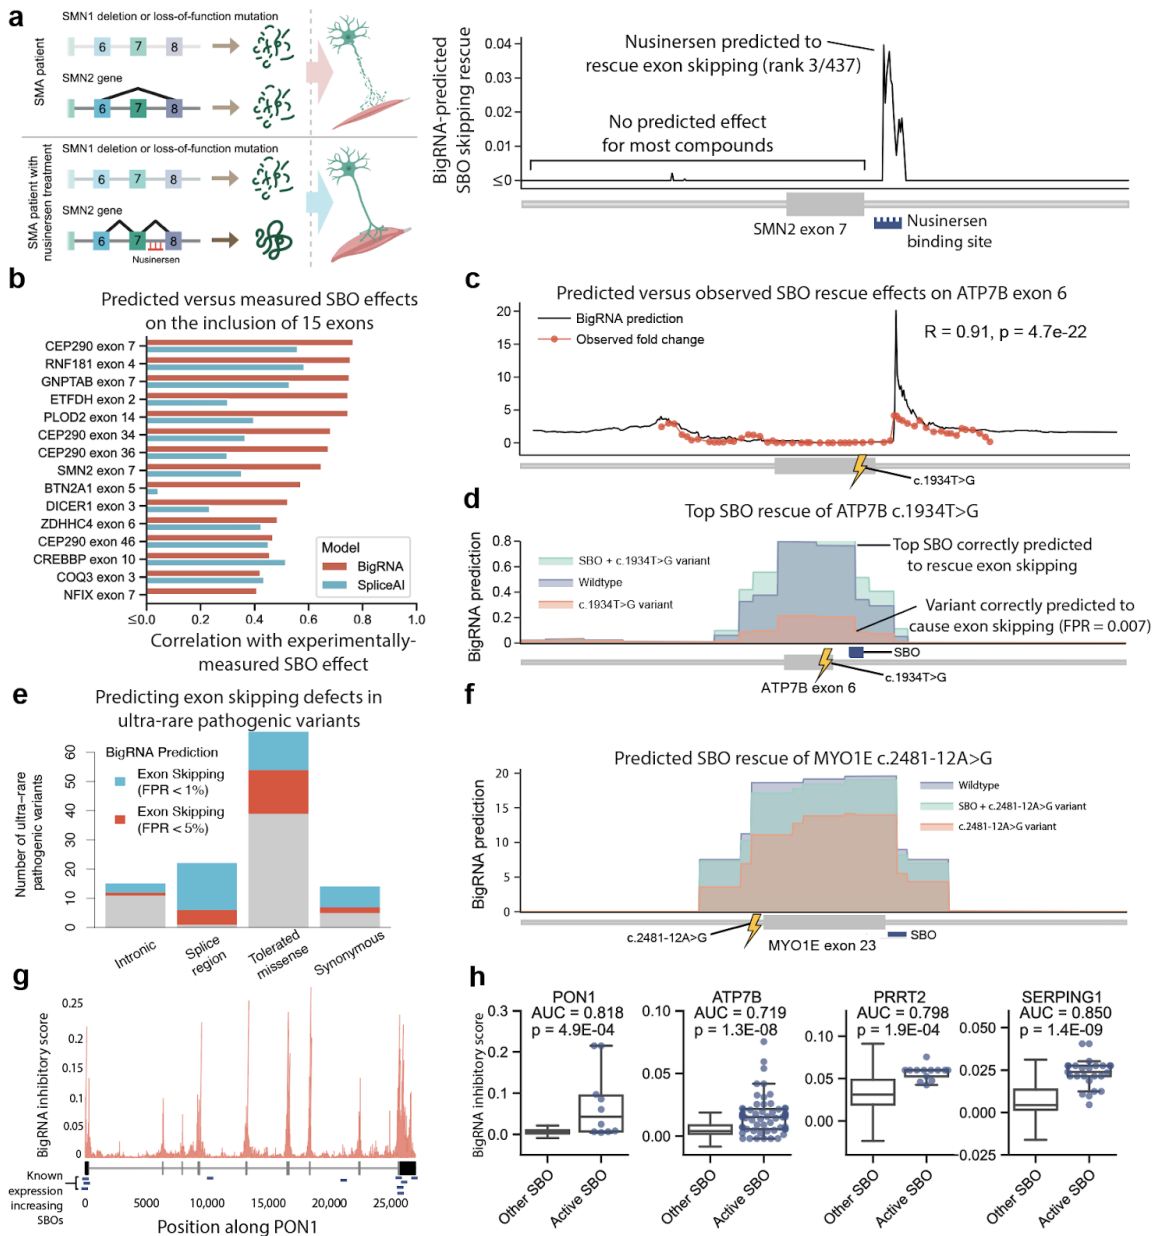

761

**762 Figure 4. BigRNA predicts the effects of steric blocking oligonucleotides. a.** Mechanism of  
**763** action of the splice-switching oligonucleotide Nusinersen, an approved treatment for spinal  
**764** muscular atrophy (SMA). BigRNA predictions are shown for the exon-restoring effects of all  
**765** 18-mer SBOs within 200 bp of SMN2 exon 7. The blue bar shows the position of Nusinersen.  
**766** Predictions were truncated at zero for the plot. **b.** Spearman correlation between experimentally  
**767** observed exon-inclusion levels and predictions generated by BigRNA and SpliceAI. A negative  
**768** correlation for NFIX exon 7 versus SpliceAI ( $r = -0.13$ ) was truncated to zero. **c.** BigRNA  
**769** predictions of SBO effects on ATP7B exon 6 inclusion. 55 SBOs were screened by qPCR to  
**770** measure total ATP7B expression relative to control (fold change), and the Spearman correlation  
**771** was computed between the BigRNA predictions and observed fold changes. **d.** BigRNA

772 predictions for wildtype, Met645Arg (c.1934T>G) variant, and Met645Arg variant with treatment  
773 (lead SBO targeting *ATP7B* exon 6). The junction count tracks pertaining to individual samples  
774 of the liver tissue are averaged for plotting. **e.** Proportion of ultra-rare pathogenic variants  
775 associated with AR disorders with BigRNA exon skipping predictions above the 1% and 5% FPR  
776 thresholds. Intronic (>8bp from splice site), splice region (<8bp from splice site excluding the  
777 core dinucleotides), tolerated missense (SIFT score > 0.05) and synonymous variants are  
778 shown. **f.** BigRNA predictions for wildtype, c.2481-12A>G variant and the variant with treatment  
779 (lead SBO targeting *MYO1E* exon 23). **g.** BigRNA predicts expression increase SBOs in *PON1*.  
780 BigRNA inhibitory scores are plotted by region of the gene. The transcript structure is shown  
781 under the scores, and the locations of the 10 dose-response hits are shown with blue bars. The  
782 distribution of BigRNA inhibitory scores for the 10 dose-response hits is significantly different  
783 from the distribution for other length-matched SBOs targeting *PON1* **h.** BigRNA scores of  
784 screening hits compared to background of all possible SBOs of same length for *PON1*, *ATP7B*,  
785 *PRRT2*, and *SERPING1*.
